# Supplementary material
Source: MDPI journal article supplement (https://www.mdpi.com/2073-4441/14/10/1603)

Supplementary document

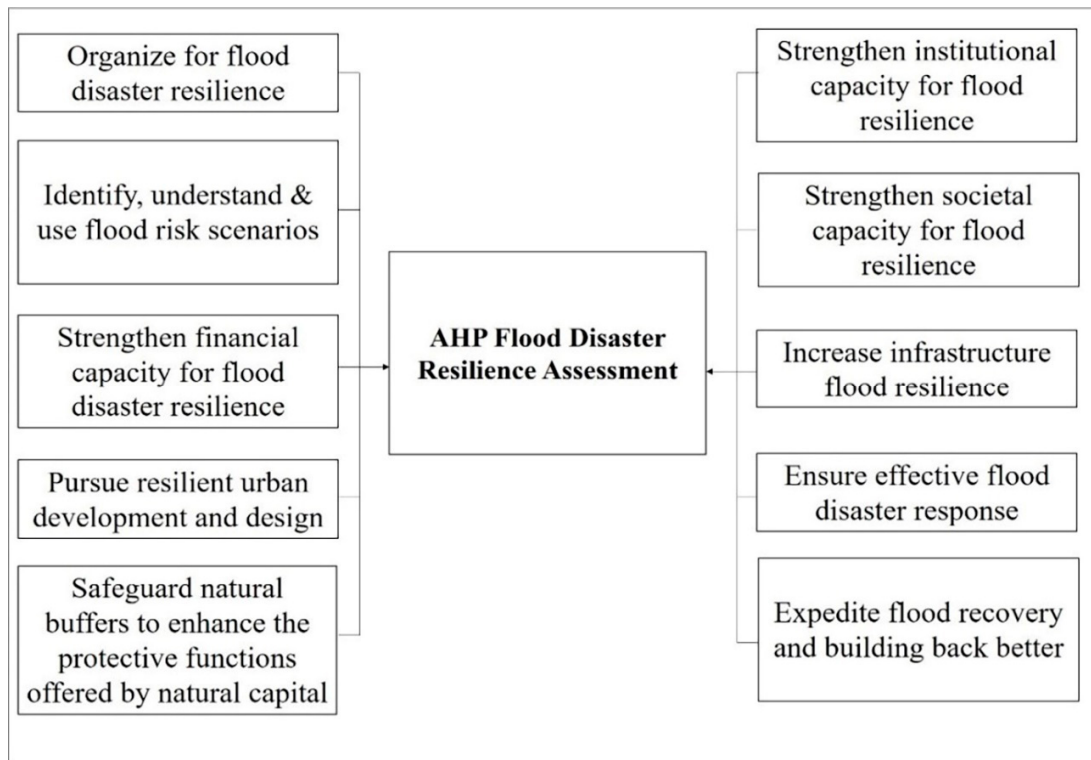

**Figure S1.** AHP flood resilience assessment modified from UNDRR.

Supplement: s1 [file s1 › water-1706869-supplementary.pdf]
